# Supplementary material for: Ultra-high resolution HLA genotyping and allele discovery by highly multiplexed cDNA amplicon pyrosequencing
Source: PubMed Central journal article supplement (PMC3575390; doi:10.1186/1471-2164-13-378), 2012-08-06

a.

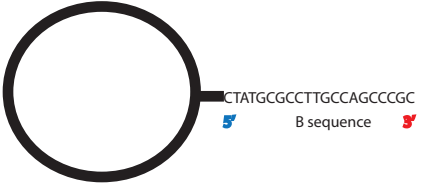

b.

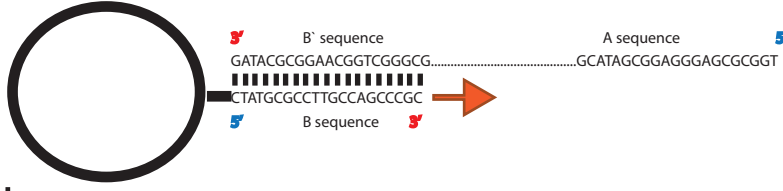

c.

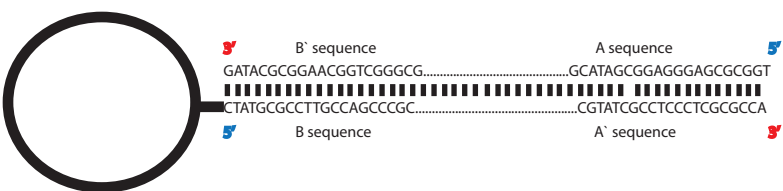

d.

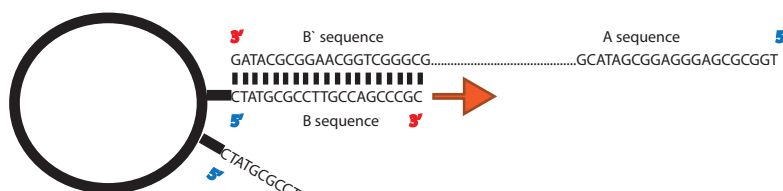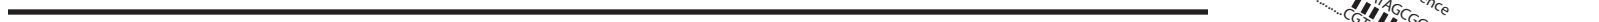

d.

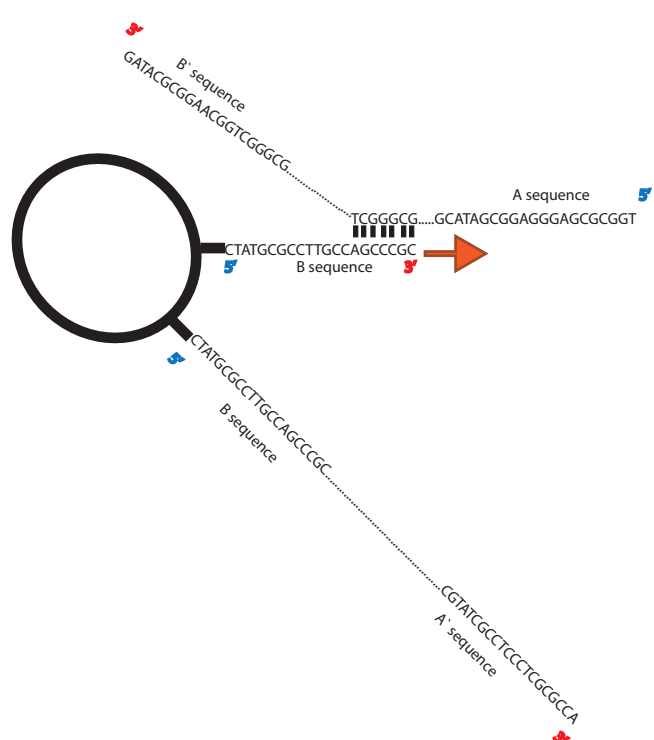

e.

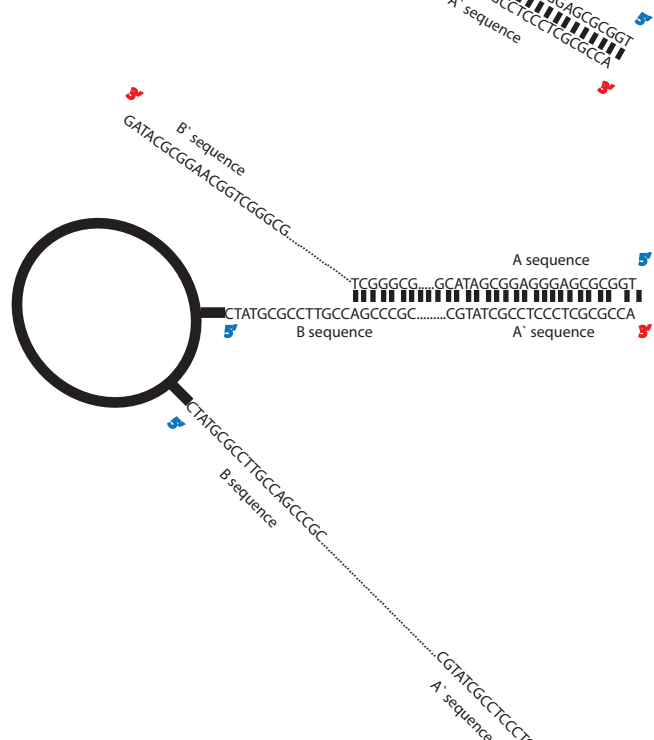

f.

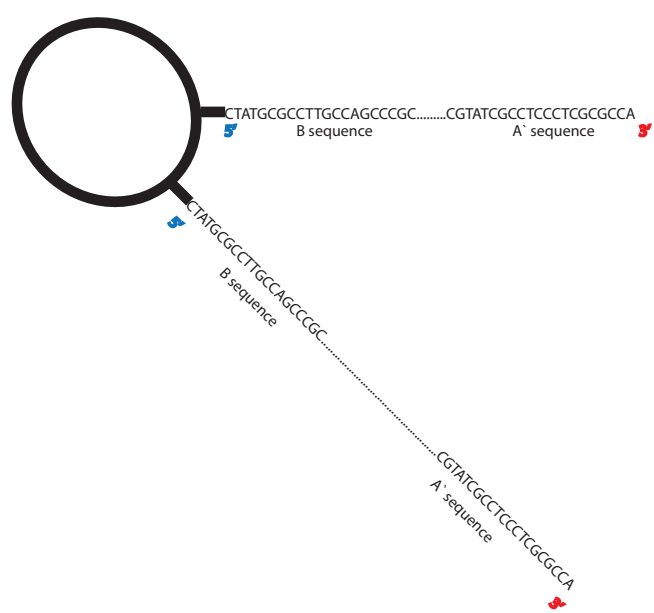

g.

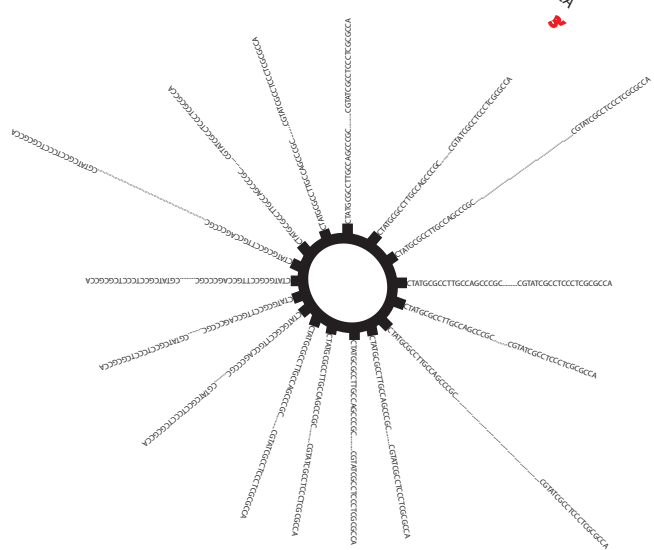

Supplement: 1471-2164-13-378-S4.pdf [file 1471-2164-13-378-S4.pdf]
